# Supplementary material
Source: PubMed Central journal article supplement (PMC2956412)
Supplement: NIHMS232775-supplement-02.pdf [file NIHMS232775-supplement-02.pdf]

Supplemental Figure 1. Oh *et al.* --- related to Figure 1.

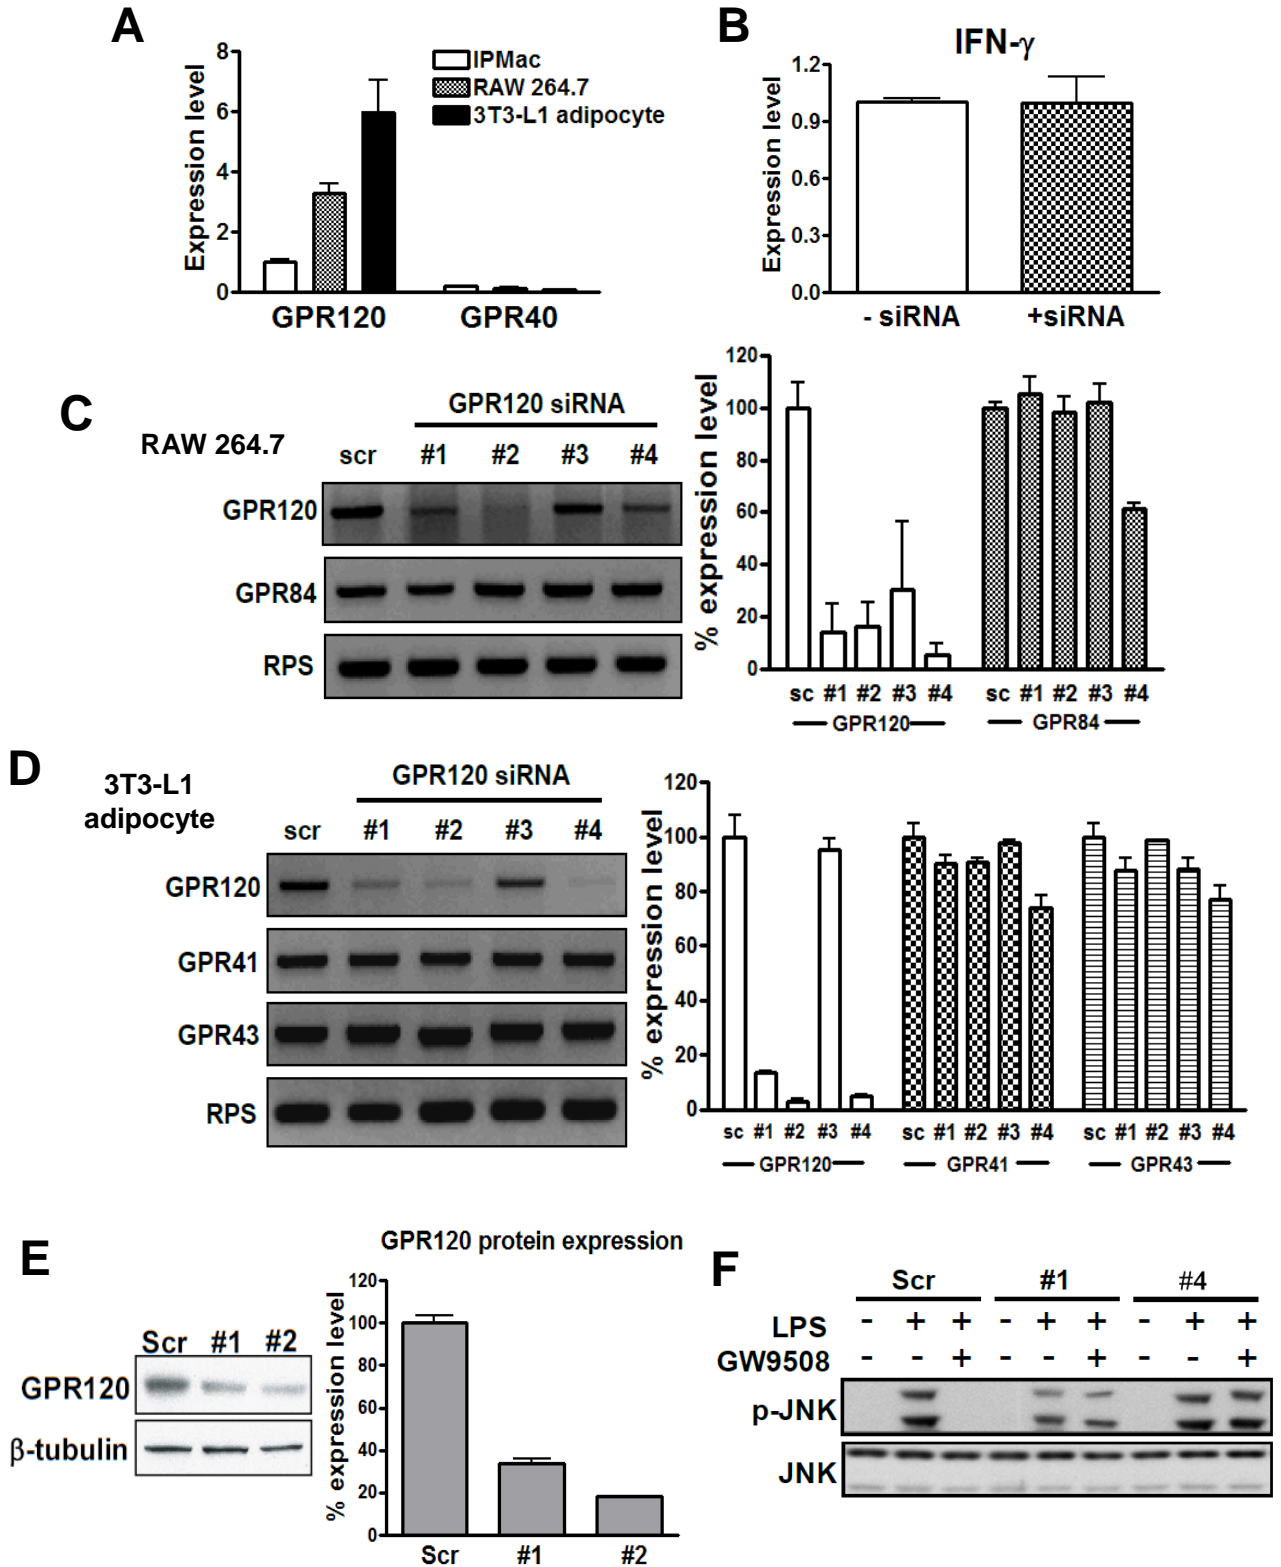

Supplemental Figure 2. Oh *et al.* ---- related to Figure 2 and 3.

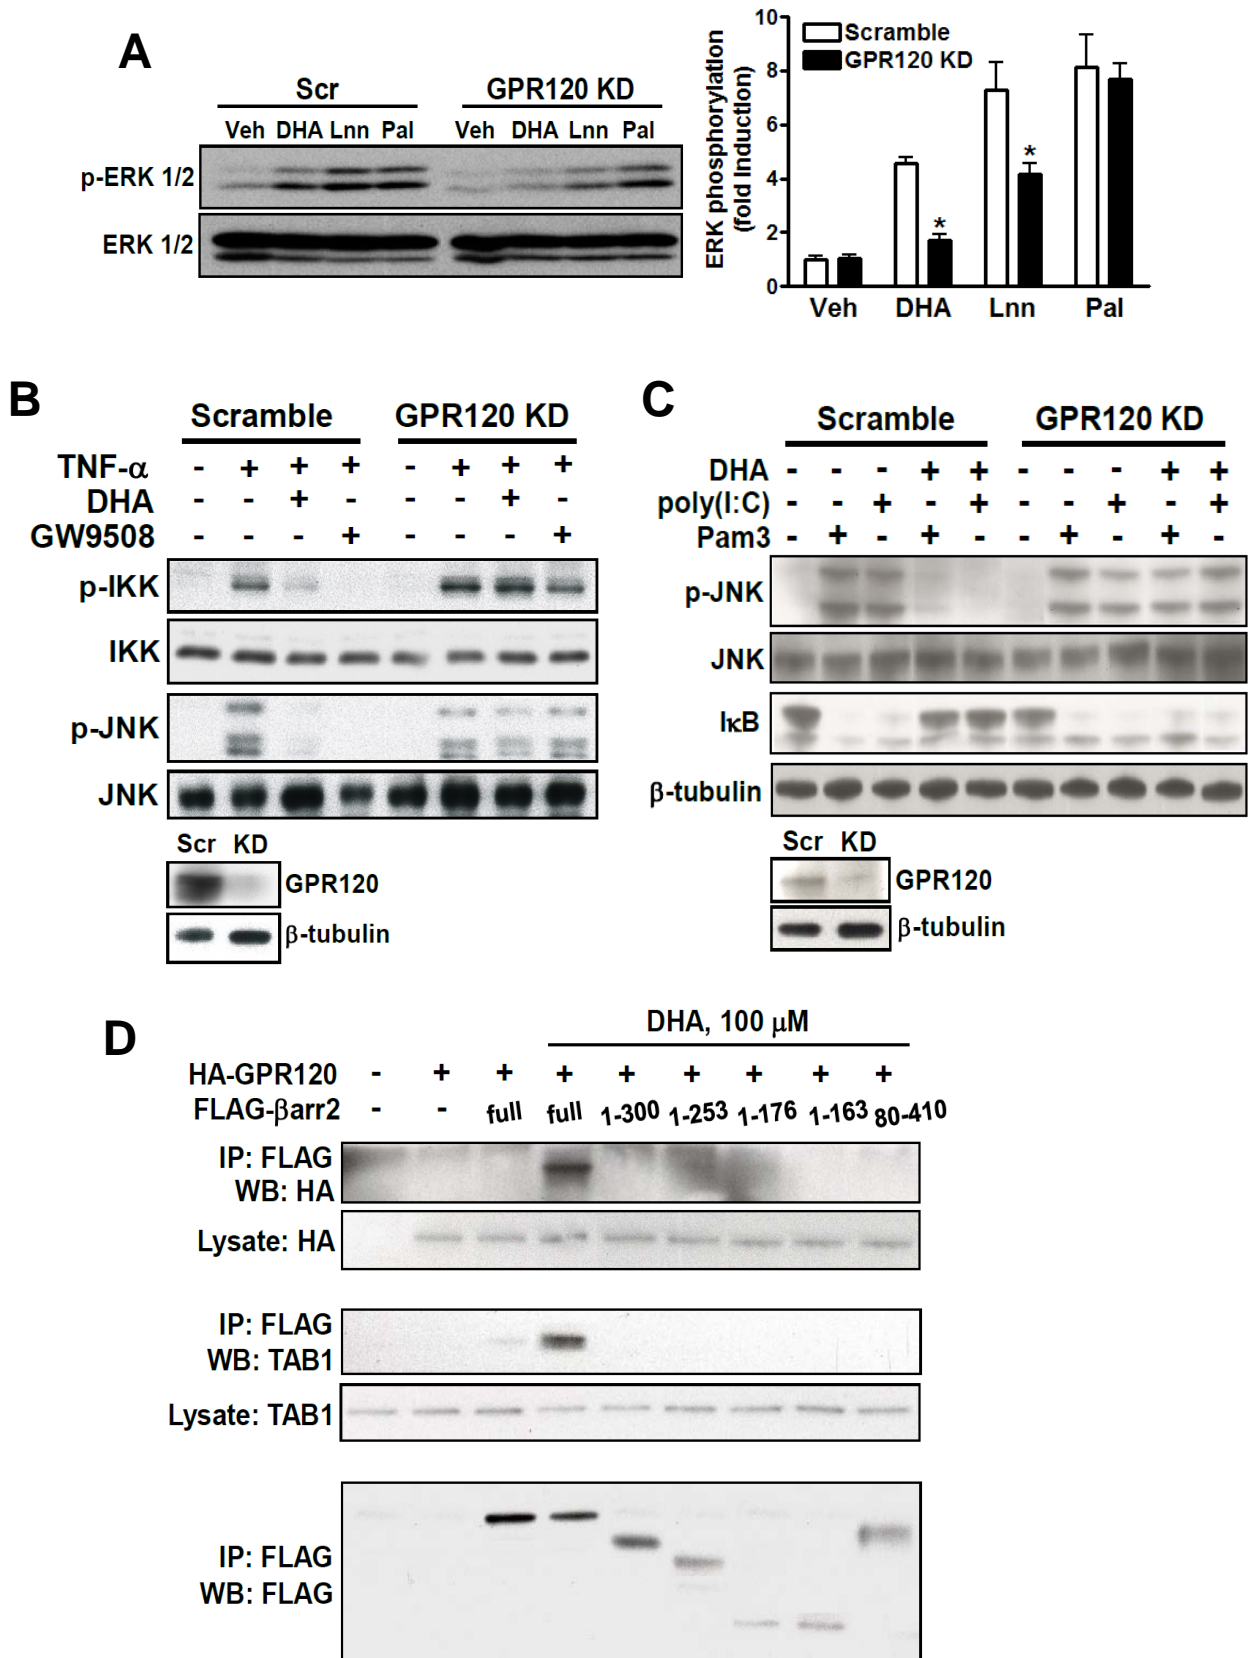

Supplemental Figure 3. Oh *et al.* --- related Figure 4.

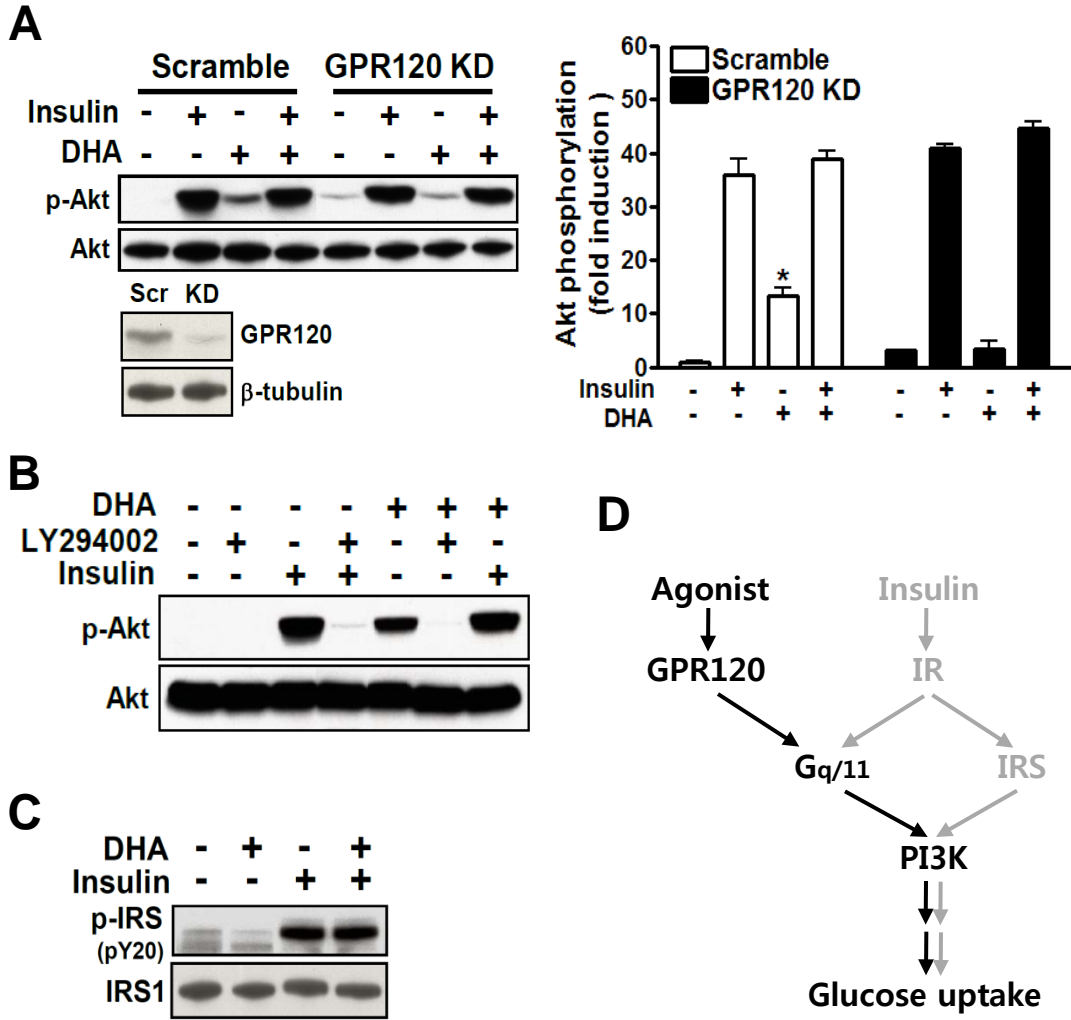

Supplemental Figure 4. Oh *et al.* --- related to Figure 5.

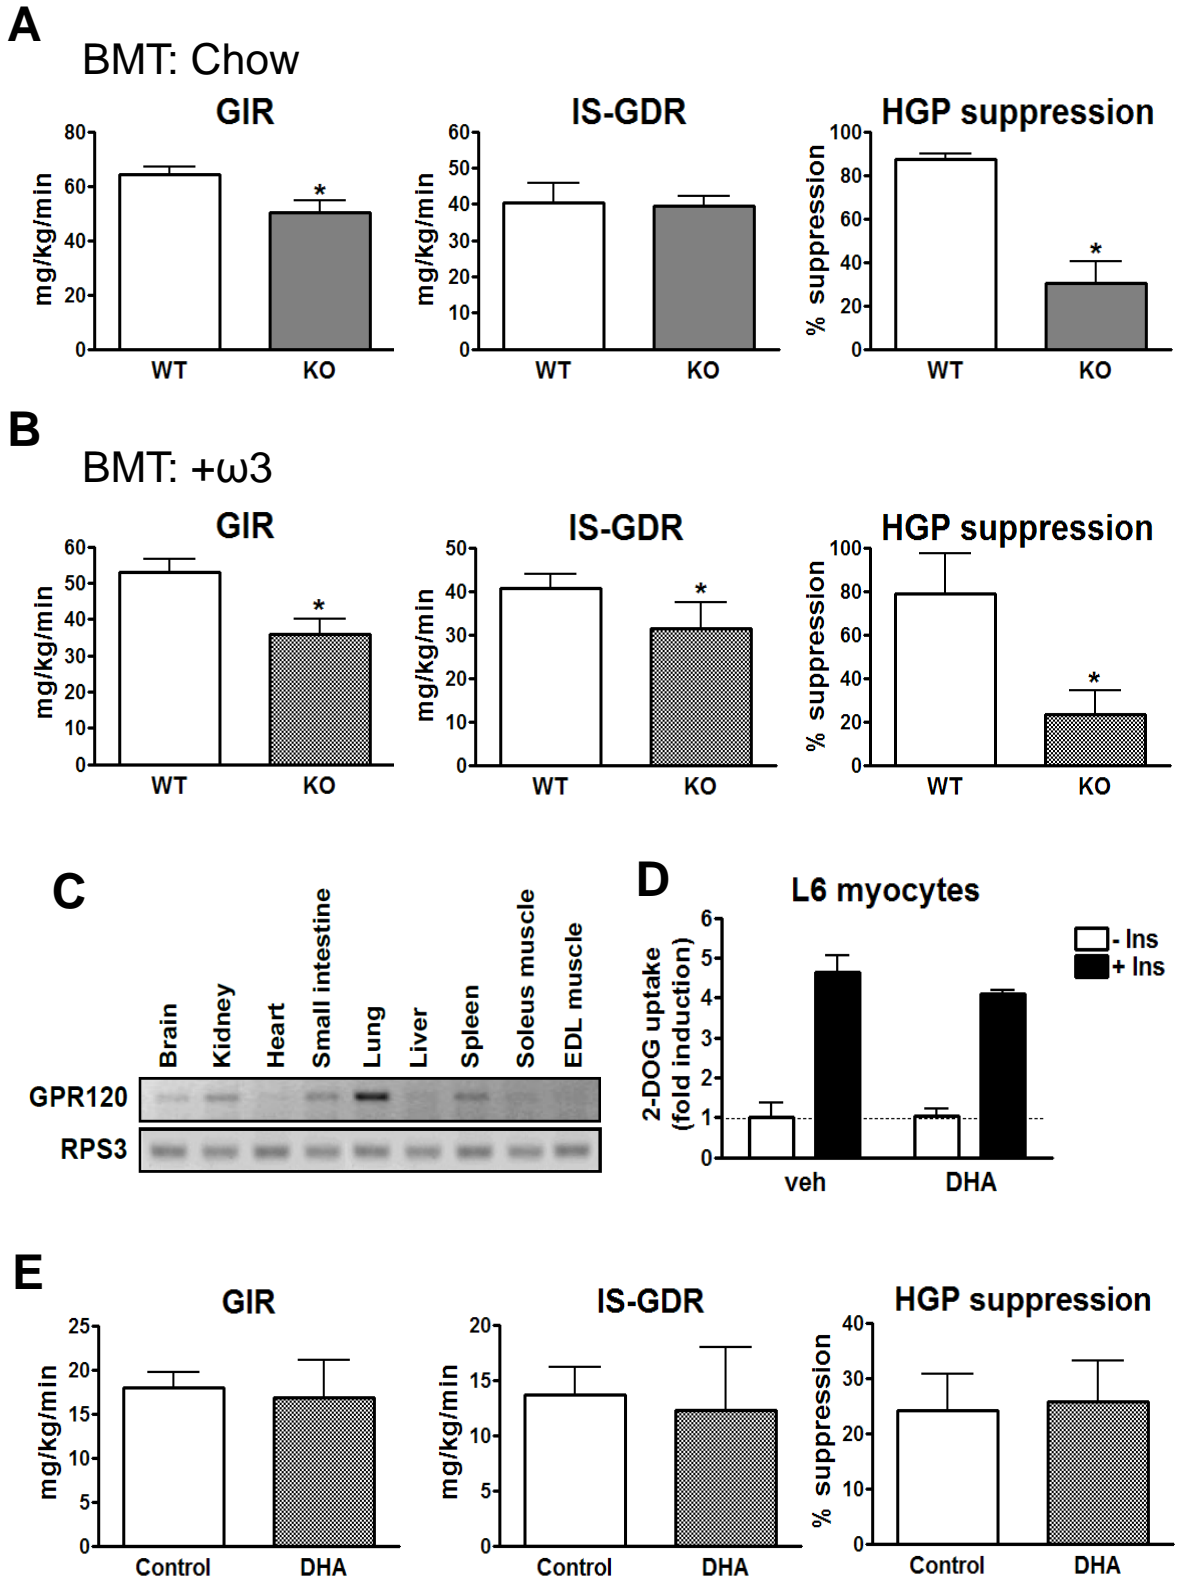

Supplemental Figure 5. Oh *et al.* --- related to Figure 5.

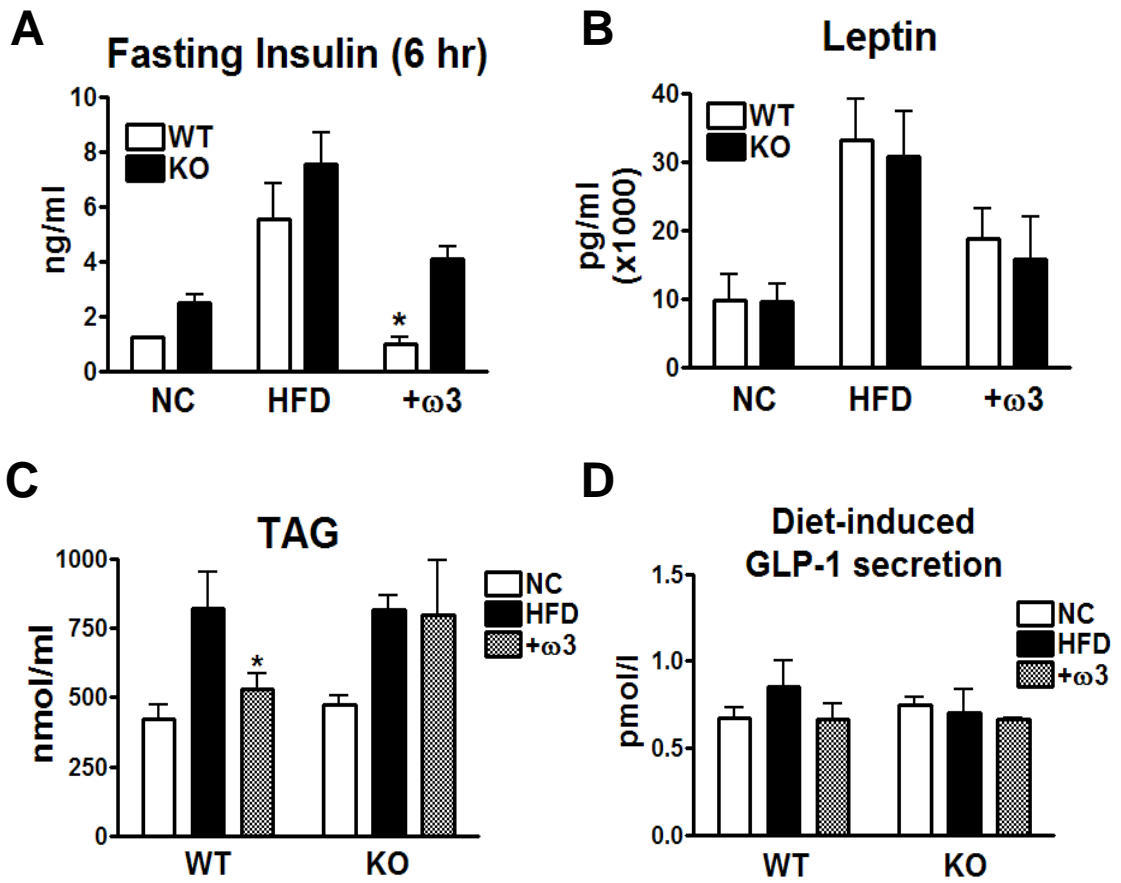

Supplemental Figure 6. Oh *et al.* --- related to Figure 5 and 7.

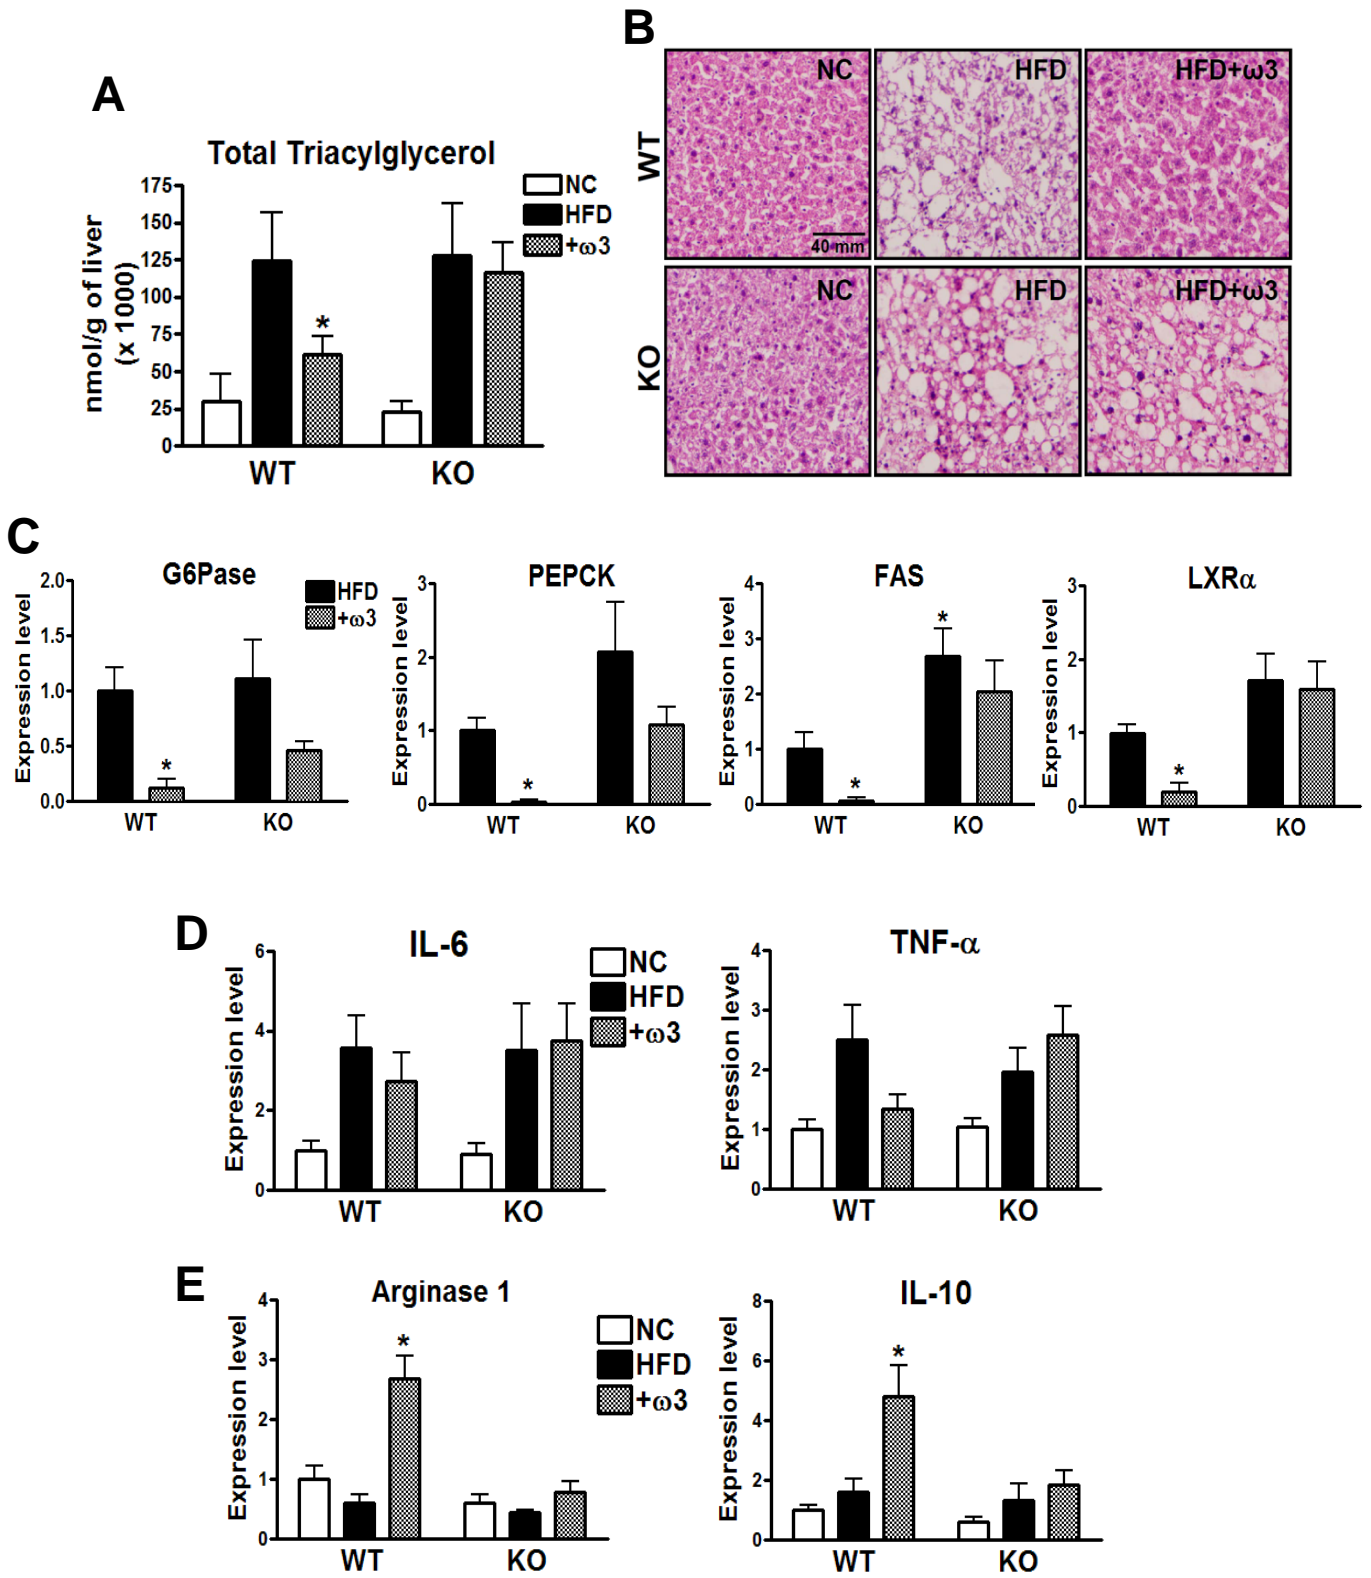

Supplemental Figure 7. Oh *et al.* --- related to Figure 7.

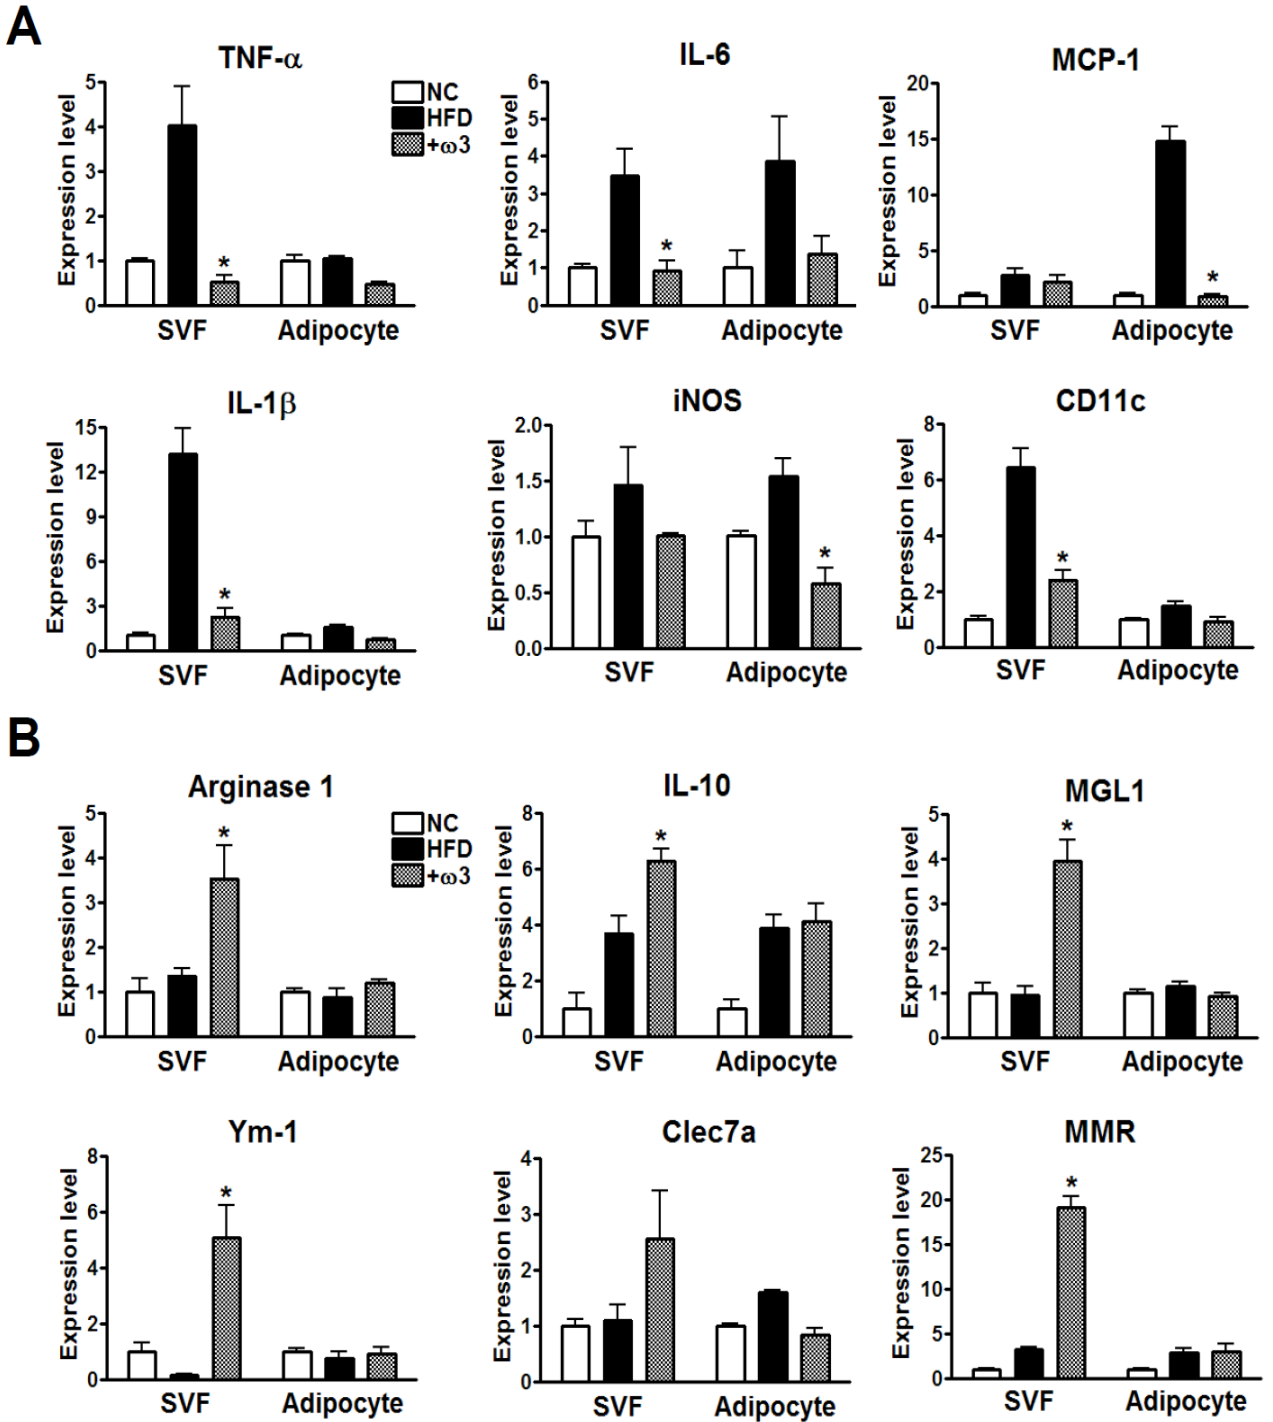

Supplemental Table 1. Oh *et al.*

| Name          | Primer Sequence                                                          |
|---------------|--------------------------------------------------------------------------|
| GPR40         | F: 5'-GCTATTCCTGGGGTGTGTGT-3'<br>R: 5'-CCCTGTGATGAGTCCCAACT-3'           |
| GPR41         | F: 5'-CTGCTCCTGCTCCTCTTC-3'<br>R: 5'-CCAGGCGACTGTAGCAGTA-3'              |
| GPR43         | F: 5'-GGCTTCTACAGCAGCATCTA-3'<br>R: 5'-AAGCACACCAGGAAATTAAG-3'           |
| GPR84         | F: 5'-TCCAATTCTGTCTCCATCCT-3'<br>R: 5'-CTGACTGGCTCAGATGAAA-3'            |
| GPR120        | F: 5'-CCATCCCTCTAGTGCTCGTC-3'<br>R: 5'-TGCGGAAGAGTCGGTAGTCT-3'           |
| RPS3          | F: 5'-ATCAGAGAGTTGACCGCAGTTG-3'<br>R: 5'-AATGAACCGAAGCACACCATAG-3'       |
| TNF- $\alpha$ | F: 5'-GCCACCACGCTCTTCTGCCT-3'<br>R: 5'-GGCTGATGGTGTGGGTGAGG-3'           |
| IL-6          | F: 5'-CCAGAGATACAAAGAAATGATGG-3'<br>R: 5'-ACTCCAGAAGACCAGAGGAAAT-3'      |
| MCP-1         | F: 5'-TCTGGACCCATTCCTTCTTG-3'<br>R: 5'-AGGTCCTGTCATGCTTCTG-3'            |
| IL-1 $\beta$  | F: 5'-AAATACCTGTGGCCTTGGGC-3'<br>R: 5'-CTTGGGATCCCACTCTCCAG-3'           |
| iNOS          | F: 5'-AATCTTGGAGCGAGTTGTGG-3'<br>R: 5'-CAGGAAGTAGGTGAGGGCTTG-3'          |
| CD11c         | F: 5'-ACGTCAGTACAAGGAGATGTTGGA-3'<br>R: 5'-ATCCTATTGCAGAATGCTTCTTTACC-3' |
| Arginase 1    | F: 5'-ATGGAAGAGACCTTCAGCTAC-3'<br>R: 5'-GCTGTCTTCCCAAGAGTTGGG-3'         |
| IL-10         | F: 5'-CATGGCCCAGAAATCAAGGA-3'<br>R: 5'-GGAGAAATCGATGACAGCGC-3'           |
| MGL1          | F: 5'-ATGATGTCTGCCAGAGAACC-3'<br>R: 5'-ATCACAGATTCAGCAACCTTA-3'          |

Continued....



Supplemental Table 1. Oh *et al.*

| Name         | Primer Sequence                                                     |
|--------------|---------------------------------------------------------------------|
| Ym-1         | F: 5'-GGGCATACCTTTATCCTGAG-3'<br>R: 5'-CCACTGAAGTCATCCATGTC-3'      |
| Clec7a       | F: 5'-AGGTTTTTCTCAGTCTTGCCTTC-3'<br>R: 5'-GGGAGCAGTGTCTCTTACTTCC-3' |
| MMR          | F: 5'-CTCGTGGATCTCCGTGACAC-3'<br>R: 5'-GCAAATGGAGCCGTCTGTGC-3'      |
| G6Pase       | F: 5'-GTTGAACCAGTCTCCGACCA-3'<br>R: 5'-CGACTCGCTATCTCCAAGTGA-3'     |
| PEPCK        | F: 5'-CTGCATAACGGTCTGGACTTC-3'<br>R: 5'--CAGCAACTGCCCGTACTCC-3'     |
| FAS          | F: 5'-GGAGGTGGTGATAGCCGGTAT-3'<br>R: 5'-TGGGTAATCCATAGAGCCAG-3'     |
| ACC1         | F: 5'-TAATGGGCTGCTTCTGTGACTC-3'<br>R: 5'-CTCAATATCGCCATCAGTCTTG-3'  |
| LXR $\alpha$ | F: 5'-GCTCTGCTCATTGCCATCAG-3'<br>R: 5'-TGTTGCAGCCTCTCTACTTGG-3'     |
| GAPDH        | F: 5'-TCACCACCATGGAGAAGGC-3'<br>R: 5'-GCTAAGCAGTTGGTGGTGCA-3'       |

Clec7a, C-type lectin domain family 7, member a; MMR, macrophage mannose receptor.

Supplemental Table 2. Oh *et al.* --- related to Figure 5.

## Individual fatty acid content in the various lipid classes (nmol/g of liver sample)

|           | Lipid classes | Palmitic         | Stearic         | Palmitoleic    | Oleic            | $\gamma$ -Linolenic | Arachidonic     |
|-----------|---------------|------------------|-----------------|----------------|------------------|---------------------|-----------------|
|           |               | C16:0            | C18:0           | C16:1n7        | C18:1n9          | C18:3n6             | C20:4n6         |
| WT<br>:NC | CE            | 1079 $\pm$ 318   | 146 $\pm$ 22    | 85 $\pm$ 23    | 330 $\pm$ 114    | 6 $\pm$ 3           | 46 $\pm$ 7      |
|           | Cardiolipin   | 1046 $\pm$ 174   | 510 $\pm$ 154   | 388 $\pm$ 28   | 915 $\pm$ 89     | 11 $\pm$ 2          | 402 $\pm$ 203   |
|           | DAG           | 694 $\pm$ 98     | 125 $\pm$ 30    | 186 $\pm$ 4    | 762 $\pm$ 180    | 9 $\pm$ 3           | 82 $\pm$ 31     |
|           | FFA           | 910 $\pm$ 153    | 293 $\pm$ 20    | 112 $\pm$ 20   | 530 $\pm$ 69     | 7 $\pm$ 1           | 115 $\pm$ 27    |
|           | LYPC          | 600 $\pm$ 228    | 171 $\pm$ 46    | 40 $\pm$ 18    | 156 $\pm$ 62     | 5 $\pm$ 2           | 58 $\pm$ 19     |
|           | PC            | 10788 $\pm$ 1648 | 3399 $\pm$ 927  | 528 $\pm$ 85   | 3482 $\pm$ 862   | 86 $\pm$ 27         | 3229 $\pm$ 666  |
|           | PE            | 4862 $\pm$ 1328  | 5987 $\pm$ 1363 | 266 $\pm$ 78   | 2054 $\pm$ 526   | 19 $\pm$ 6          | 6420 $\pm$ 1884 |
|           | TAG           | 9901 $\pm$ 2706  | 723 $\pm$ 168   | 2366 $\pm$ 839 | 14240 $\pm$ 3806 | 96 $\pm$ 20         | 396 $\pm$ 94    |

|           | Lipid classes | Palmitic         | Stearic        | Palmitoleic     | Oleic            | $\gamma$ -Linolenic | Arachidonic    |
|-----------|---------------|------------------|----------------|-----------------|------------------|---------------------|----------------|
|           |               | C16:0            | C18:0          | C16:1n7         | C18:1n9          | C18:3n6             | C20:4n6        |
| KO<br>:NC | CE            | 1702 $\pm$ 320   | 176 $\pm$ 12   | 93 $\pm$ 26     | 276 $\pm$ 65     | 2 $\pm$ 0.4         | 36 $\pm$ 6     |
|           | Cardiolipin   | 951 $\pm$ 125    | 606 $\pm$ 117  | 254 $\pm$ 44    | 890 $\pm$ 148    | 15 $\pm$ 1          | 411 $\pm$ 52   |
|           | DAG           | 577 $\pm$ 90     | 114 $\pm$ 8    | 91 $\pm$ 34     | 528 $\pm$ 115    | 10 $\pm$ 2          | 70 $\pm$ 4     |
|           | FFA           | 833 $\pm$ 125    | 254 $\pm$ 19   | 64 $\pm$ 21     | 339 $\pm$ 49     | 7 $\pm$ 1           | 77 $\pm$ 10    |
|           | LYPC          | 293 $\pm$ 15     | 187 $\pm$ 5    | 7 $\pm$ 2       | 51 $\pm$ 3       | 1 $\pm$ 0.3         | 56 $\pm$ 5     |
|           | PC            | 10760 $\pm$ 544  | 4490 $\pm$ 221 | 345 $\pm$ 66    | 2435 $\pm$ 109   | 87 $\pm$ 12         | 3401 $\pm$ 168 |
|           | PE            | 4346 $\pm$ 277   | 6960 $\pm$ 556 | 153 $\pm$ 25    | 1636 $\pm$ 108   | 14 $\pm$ 2          | 6273 $\pm$ 446 |
|           | TAG           | 14337 $\pm$ 4492 | 1233 $\pm$ 664 | 3227 $\pm$ 1275 | 16560 $\pm$ 6067 | 224 $\pm$ 15        | 586 $\pm$ 97   |

|            | Lipid classes | Palmitic          | Stearic         | Palmitoleic      | Oleic              | $\gamma$ -Linolenic | Arachidonic     |
|------------|---------------|-------------------|-----------------|------------------|--------------------|---------------------|-----------------|
|            |               | C16:0             | C18:0           | C16:1n7          | C18:1n9            | C18:3n6             | C20:4n6         |
| WT<br>:HFD | CE            | 1293 $\pm$ 98     | 183 $\pm$ 11    | 437 $\pm$ 87     | 2252 $\pm$ 303     | 6 $\pm$ 1           | 191 $\pm$ 13    |
|            | Cardiolipin   | 786 $\pm$ 66      | 421 $\pm$ 32    | 134 $\pm$ 21     | 1213 $\pm$ 113     | 19 $\pm$ 1          | 500 $\pm$ 28    |
|            | DAG           | 1689 $\pm$ 403    | 189 $\pm$ 23    | 181 $\pm$ 45     | 2392 $\pm$ 54      | 32 $\pm$ 5          | 218 $\pm$ 33    |
|            | FFA           | 971 $\pm$ 106     | 182 $\pm$ 6     | 83 $\pm$ 18      | 965 $\pm$ 172      | 13 $\pm$ 2          | 238 $\pm$ 41    |
|            | LYPC          | 393 $\pm$ 75      | 250 $\pm$ 13    | 8 $\pm$ 3        | 76 $\pm$ 11        | 2 $\pm$ 0.2         | 138 $\pm$ 6     |
|            | PC            | 9692 $\pm$ 540    | 541 $\pm$ 389   | 176 $\pm$ 22     | 2512 $\pm$ 180     | 87 $\pm$ 9          | 7199 $\pm$ 295  |
|            | PE            | 2156 $\pm$ 140    | 444 $\pm$ 333   | 58 $\pm$ 9       | 1322 $\pm$ 124     | 9 $\pm$ 1           | 5658 $\pm$ 313  |
|            | TAG           | 95051 $\pm$ 22995 | 5463 $\pm$ 1200 | 12968 $\pm$ 3700 | 148220 $\pm$ 39008 | 1784 $\pm$ 520      | 7221 $\pm$ 2125 |

|            | Lipid classes | Palmitic          | Stearic         | Palmitoleic     | Oleic              | $\gamma$ -Linolenic | Arachidonic     |
|------------|---------------|-------------------|-----------------|-----------------|--------------------|---------------------|-----------------|
|            |               | C16:0             | C18:0           | C16:1n7         | C18:1n9            | C18:3n6             | C20:4n6         |
| KO<br>:HFD | CE            | 1165 $\pm$ 71     | 165 $\pm$ 11    | 374 $\pm$ 109   | 2048 $\pm$ 447     | 7 $\pm$ 1           | 212 $\pm$ 16    |
|            | Cardiolipin   | 954 $\pm$ 121     | 674 $\pm$ 92    | 133 $\pm$ 16    | 1311 $\pm$ 165     | 23 $\pm$ 3          | 786 $\pm$ 109   |
|            | DAG           | 1639 $\pm$ 432    | 198 $\pm$ 25    | 145 $\pm$ 34    | 2192 $\pm$ 562     | 31 $\pm$ 7          | 220 $\pm$ 24    |
|            | FFA           | 910 $\pm$ 57      | 187 $\pm$ 13    | 65 $\pm$ 4      | 865 $\pm$ 62       | 12 $\pm$ 1          | 240 $\pm$ 20    |
|            | LYPC          | 390 $\pm$ 52      | 263 $\pm$ 19    | 6 $\pm$ 2       | 76 $\pm$ 8         | 2 $\pm$ 0.4         | 144 $\pm$ 13    |
|            | PC            | 9224 $\pm$ 312    | 5599 $\pm$ 444  | 146 $\pm$ 7     | 2299 $\pm$ 130     | 81 $\pm$ 9          | 7588 $\pm$ 526  |
|            | PE            | 1961 $\pm$ 29     | 4099 $\pm$ 223  | 51 $\pm$ 2      | 1194 $\pm$ 34      | 9 $\pm$ 1           | 5100 $\pm$ 154  |
|            | TAG           | 92932 $\pm$ 28951 | 6421 $\pm$ 1735 | 9855 $\pm$ 2533 | 144137 $\pm$ 49878 | 1707 $\pm$ 446      | 7556 $\pm$ 2025 |

|                     | Lipid classes | Palmitic         | Stearic        | Palmitoleic     | Oleic            | $\gamma$ -Linolenic | Arachidonic    |
|---------------------|---------------|------------------|----------------|-----------------|------------------|---------------------|----------------|
|                     |               | C16:0            | C18:0          | C16:1n7         | C18:1n9          | C18:3n6             | C20:4n6        |
| WT<br>:+ $\omega$ 3 | CE            | 865 $\pm$ 82     | 90 $\pm$ 11    | 294 $\pm$ 53    | 684 $\pm$ 60     | 4 $\pm$ 1           | 71 $\pm$ 12    |
|                     | Cardiolipin   | 1410 $\pm$ 294   | 666 $\pm$ 78   | 263 $\pm$ 55    | 1251 $\pm$ 276   | 14 $\pm$ 4          | 322 $\pm$ 88   |
|                     | DAG           | 875 $\pm$ 71     | 123 $\pm$ 5    | 126 $\pm$ 30    | 935 $\pm$ 87     | 8 $\pm$ 0.8         | 73 $\pm$ 5     |
|                     | FFA           | 854 $\pm$ 61     | 150 $\pm$ 8    | 67 $\pm$ 15     | 418 $\pm$ 33     | 4 $\pm$ 0.2         | 81 $\pm$ 6     |
|                     | LYPC          | 525 $\pm$ 34     | 199 $\pm$ 12   | 14 $\pm$ 3      | 67 $\pm$ 3       | 1 $\pm$ 0.1         | 66 $\pm$ 4     |
|                     | PC            | 13212 $\pm$ 412  | 3750 $\pm$ 289 | 385 $\pm$ 60    | 2178 $\pm$ 57    | 38 $\pm$ 2          | 2474 $\pm$ 210 |
|                     | PE            | 3963 $\pm$ 331   | 6397 $\pm$ 763 | 152 $\pm$ 30    | 1259 $\pm$ 31    | 8 $\pm$ 0.4         | 3478 $\pm$ 415 |
|                     | TAG           | 34899 $\pm$ 5385 | 3717 $\pm$ 603 | 5067 $\pm$ 1297 | 42842 $\pm$ 7018 | 469 $\pm$ 104       | 1602 $\pm$ 385 |

|                     | Lipid classes | Palmitic          | Stearic        | Palmitoleic     | Oleic              | $\gamma$ -Linolenic | Arachidonic     |
|---------------------|---------------|-------------------|----------------|-----------------|--------------------|---------------------|-----------------|
|                     |               | C16:0             | C18:0          | C16:1n7         | C18:1n9            | C18:3n6             | C20:4n6         |
| KO<br>:+ $\omega$ 3 | CE            | 974 $\pm$ 71      | 112 $\pm$ 10   | 462 $\pm$ 133   | 1413 $\pm$ 500     | 5 $\pm$ 0.7         | 85 $\pm$ 12     |
|                     | Cardiolipin   | 1376 $\pm$ 142    | 1003 $\pm$ 147 | 222 $\pm$ 24    | 1198 $\pm$ 105     | 14 $\pm$ 3          | 502 $\pm$ 107   |
|                     | DAG           | 1000 $\pm$ 239    | 144 $\pm$ 17   | 143 $\pm$ 46    | 1413 $\pm$ 484     | 15 $\pm$ 6          | 108 $\pm$ 32    |
|                     | FFA           | 839 $\pm$ 147     | 152 $\pm$ 8    | 71 $\pm$ 21     | 590 $\pm$ 220      | 5 $\pm$ 3           | 82 $\pm$ 60     |
|                     | LYPC          | 523 $\pm$ 70      | 220 $\pm$ 13   | 15 $\pm$ 5      | 78 $\pm$ 10        | 2 $\pm$ 0.3         | 56 $\pm$ 20     |
|                     | PC            | 12206 $\pm$ 537   | 4190 $\pm$ 345 | 320 $\pm$ 39    | 2452 $\pm$ 218     | 37 $\pm$ 13         | 2689 $\pm$ 861  |
|                     | PE            | 3818 $\pm$ 425    | 7027 $\pm$ 719 | 100 $\pm$ 17    | 1272 $\pm$ 128     | 9 $\pm$ 1           | 4123 $\pm$ 420  |
|                     | TAG           | 75375 $\pm$ 15383 | 6127 $\pm$ 768 | 8862 $\pm$ 2180 | 113937 $\pm$ 31584 | 1302 $\pm$ 438      | 4999 $\pm$ 1806 |

CE, cholesterol ester; DAG, diacylglycerol; FFA, free fatty acid; LYPC, lysophosphatidylcholine; PC, phosphatidylcholine; PE, phosphatidylethanolamine; PS, phosphatidylserine; TAG, triacylglycerol
